# Supplementary material
Source: PubMed Central journal article supplement (PMC5984503)
Supplement: pnas.1720267115.sapp.pdf [file pnas.1720267115.sapp.pdf]

## Supplementary figures

**Estrogen receptor beta controls proliferation of enteric glial cells and differentiation of neurons in the myenteric plexus after damage.**

D'Errico F<sup>1,2,3</sup>, Goverse G<sup>3</sup>, Dai Y<sup>2</sup>, Wu W<sup>2</sup>, Stakenborg M<sup>3</sup>, LabeeuwE<sup>3</sup>, De Simone V<sup>3</sup>, Verstockt B<sup>3</sup>, Gomez-Pinilla PJ<sup>3</sup>, Warner M<sup>2</sup>, Di Leo A<sup>1</sup>, Matteoli G<sup>3\*</sup> and Gustafsson JA<sup>2\*</sup>

<sup>1</sup>University of Bari, Department of Emergency and Organ Transplantation, Gastroenterology department, Bari, Italy; <sup>2</sup>University of Houston, Department of biology and biochemistry, Center for nuclear receptors and cell signaling (CNRCS), Houston, TX (USA); <sup>3</sup>KU Leuven, Department of Clinical and Experimental Medicine, Translational Research Center for Gastrointestinal Disorders (TARGID), Leuven, Belgium.

\*These authors contributed equally as co-last authors.

Prof. Gianluca Matteoli  
Department of Clinical and Experimental Medicine  
Translational Research Center for Gastrointestinal Disorders (TARGID)  
KU Leuven; Herestraat 49, O&N1, bus 701; 3000, Leuven, Belgium  
Tel: +32-16-330238  
E-mail: gianluca.matteoli@kuleuven.be

Prof. Jan-Ake Gustafsson  
Department of Biology and Biochemistry  
Center for nuclear receptors and cell signaling (CNRCS)  
University of Houston, 3605 Cullen Blvd  
Science & Engineering Research Center Bldg 545  
Houston, TX (USA) 77204-5056  
Tel: 832.842.8803  
E-mail: jgustafs@Central.UH.EDU

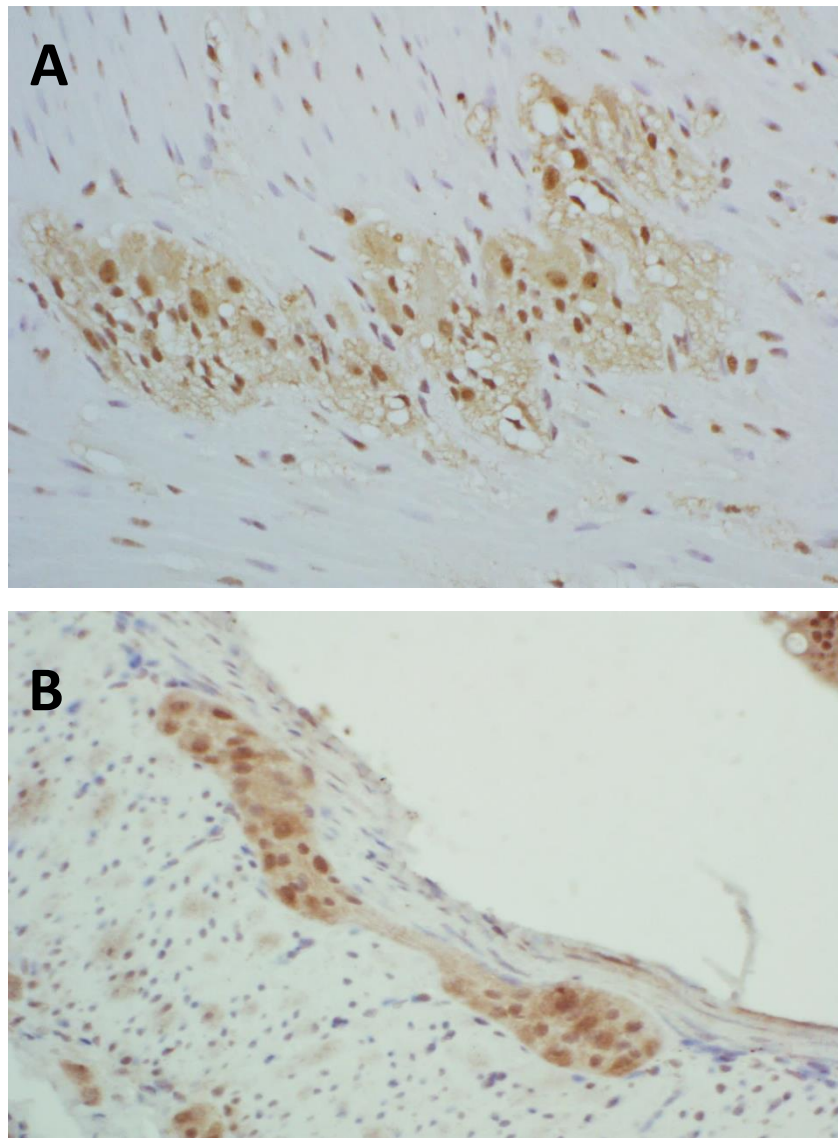

**Fig. S1 Estrogen receptor beta (Er $\beta$ ) expression in mouse and human myenteric plexus.**

Immunohistochemical images of muscularis externa of human (A) and mouse (B) showing high expression of Er $\beta$  (brown nuclear staining) in the myenteric plexus.

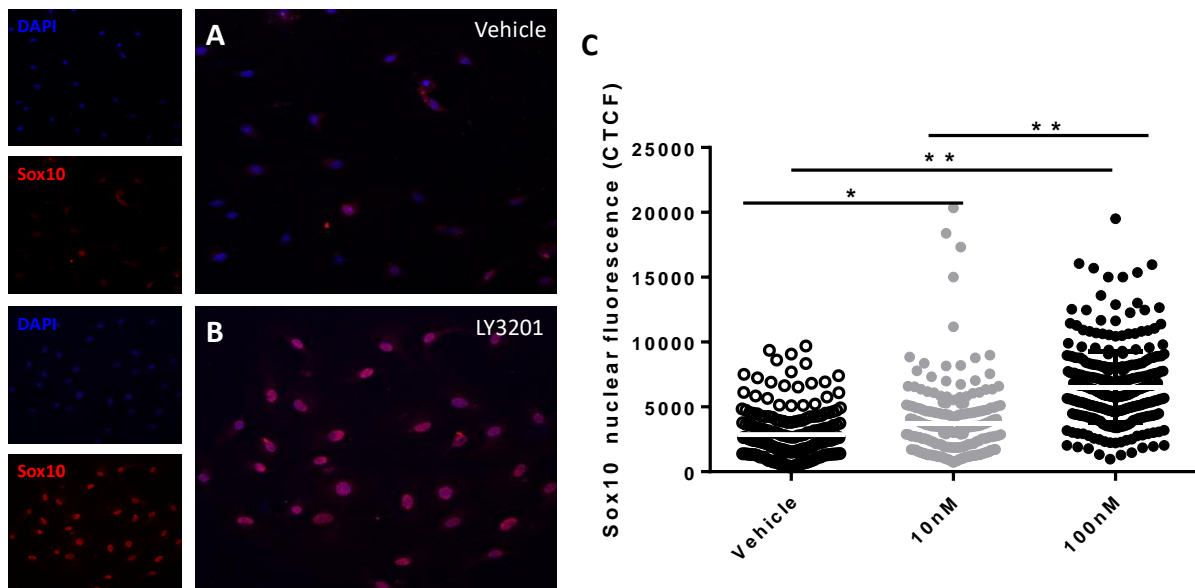

**Fig.S2 LY3201 increases the intensity of fluorescence of Sox10.** To investigate whether Sox10 belongs to the pool of Er $\beta$ -regulated genes murine myenteric ganglia were cultured for 7 days with different concentration of LY3201 as indicated. Immunofluorescence images of individual ganglia cultured with vehicle (A) and with LY3201 100nM (B) were stained with anti-Sox10 (red). (C) Sox10 nuclear fluorescence intensity (CTCF) significantly increased upon treatment with LY3201 in a dose-dependent manner. One-way ANOVA followed by Dunnett's Multiple Comparison Test (\*p<0,05; \*\*p<0,001).

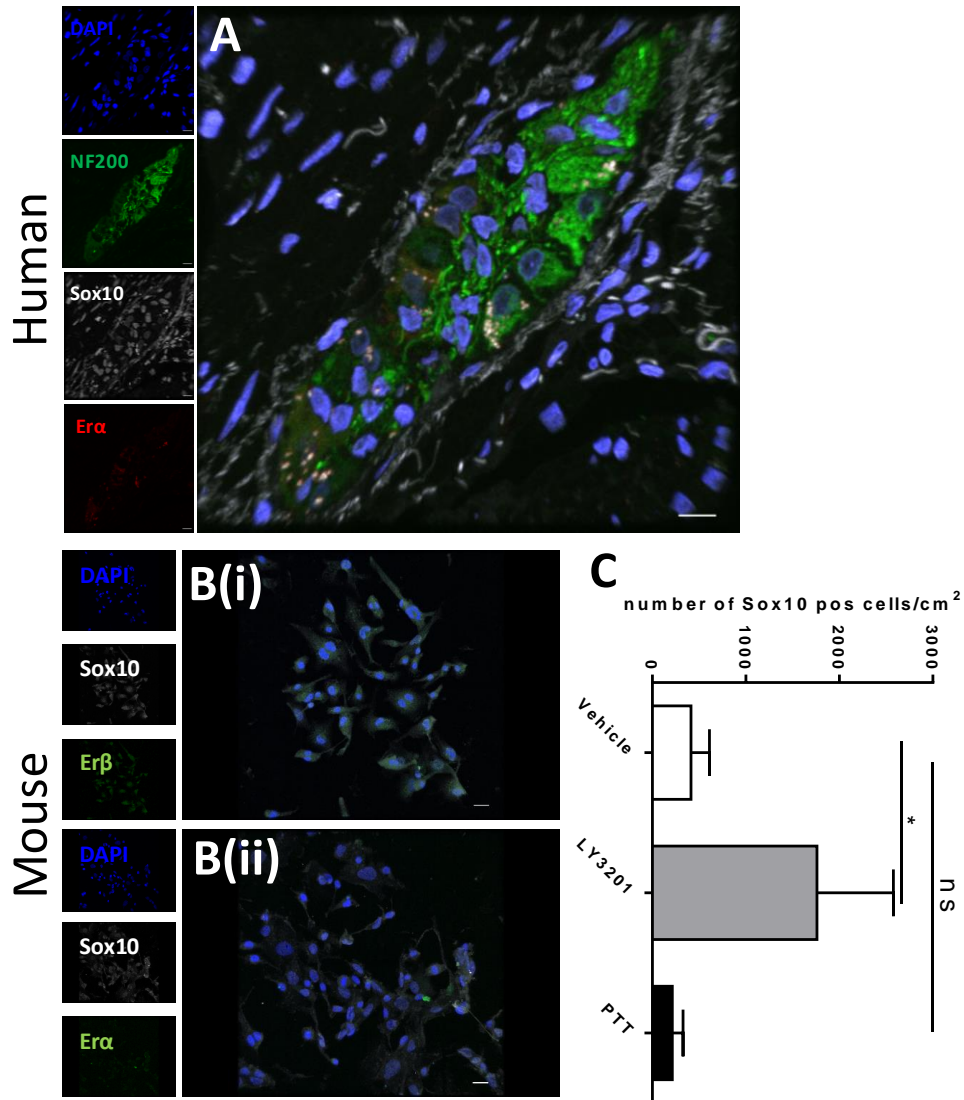

**Fig.S3 Estrogen receptor alpha (Er $\alpha$ ) expression is low to not detectable in human myenteric plexus and in murine cultured myenteric ganglia.** (A) Confocal microscopy images of myenteric plexus from the colon of human stained for Er $\alpha$  (red), neurofilament (NF-200) (green), Sox10 (grey) and DAPI (blue). (B) Immunofluorescence images of individual murine myenteric ganglia stained for Er $\beta$  (Bi) and Er $\alpha$  (Bii). (C) Murine myenteric ganglia culture for 7 days in the presence of the specific Er $\beta$  agonist LY3201 and with the Er $\alpha$  agonist PPT. One-way ANOVA followed by Dunnett's Multiple Comparison Test (\* $p < 0,05$ ).
